# Supplementary material
Source: PubMed Central journal article supplement (PMC3884596)
Supplement: NIHMS537008-supplement-Supplemental_Figure.pdf [file NIHMS537008-supplement-Supplemental_Figure.pdf]

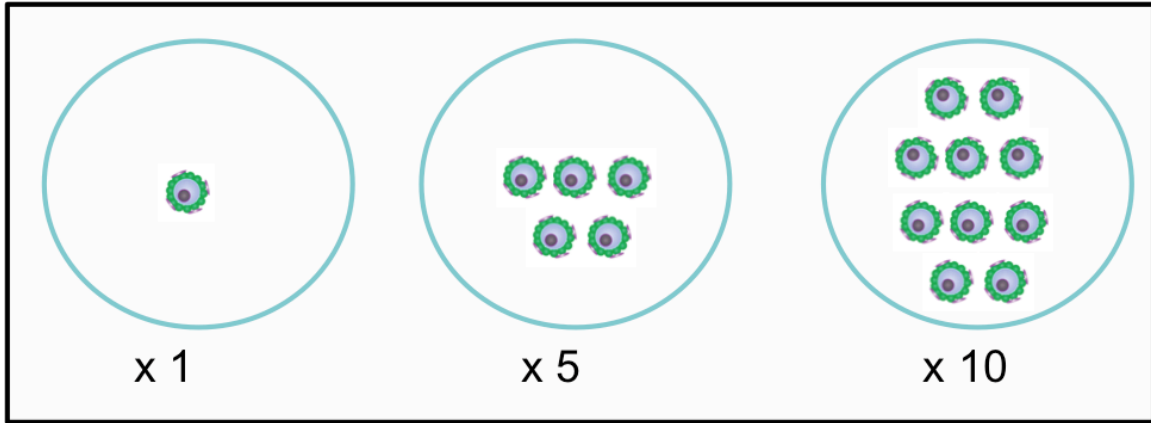

**Supplemental Figure 1: Group culture was achieved by encapsulating multiple follicles in a single alginate bead.** Schematic of follicles in alginate beads individually, in a group of 5 (x5) or a group of 10 (x10).
